# Supplementary material for: Efficient all p-type heterojunction photocathodes for photoelectrochemical water splitting
Source: Royal Society of Chemistry journal article supplement (doi:10.1039/c7dt01285c), 2017-01-01
Supplement: c7dt01285c1.pdf [file c7dt01285c1.pdf]

**Supplemental information:**

Fig.S1 Brief schematic diagram of synthetic route of  $\text{Co}_3\text{O}_4$  nanostructures

Fig.S2 Typical cross-section view SEM images of (a)  $\text{Co}_3\text{O}_4$  NSs, (b)  $\text{Co}_3\text{O}_4$  NPs and (c)  $\text{Co}_3\text{O}_4$  NCs

Fig.S3 Mott-Schottky plots of  $\text{Co}_3\text{O}_4$  nanostructures

Fig.S4 Band gap of  $\text{Co}_3\text{O}_4$  nanostructures

Fig.S5 Brief schematic diagram of synthetic route of  $\text{Co}_3\text{O}_4/\text{Sb}_2\text{S}_3$  heterojunctions

Fig.S6 Mott-Schottky plots of  $\text{Co}_3\text{O}_4/\text{Sb}_2\text{S}_3$  heterojunctions

Fig.S7 Band gap of  $\text{Co}_3\text{O}_4/\text{Sb}_2\text{S}_3$  heterojunctions

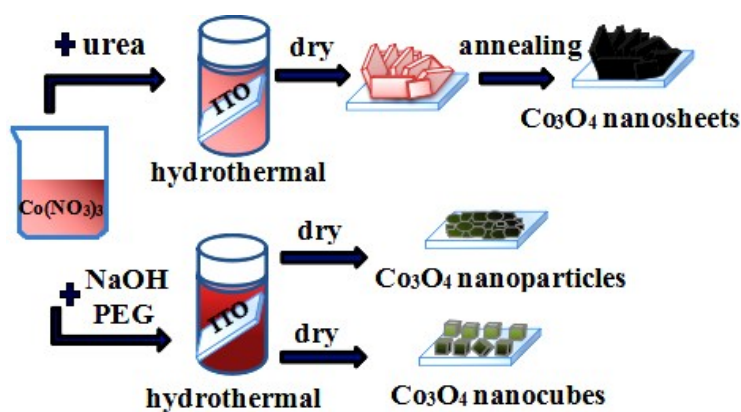

Fig.S1 Brief schematic diagram of synthetic route of  $\text{Co}_3\text{O}_4$  nanostructures

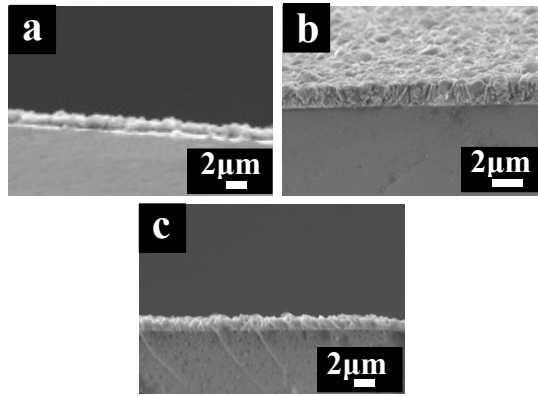

Fig.S2 Typical cross-section view SEM images of (a) Co<sub>3</sub>O<sub>4</sub> NSs, (b) Co<sub>3</sub>O<sub>4</sub> NPs and (c) Co<sub>3</sub>O<sub>4</sub> NCs

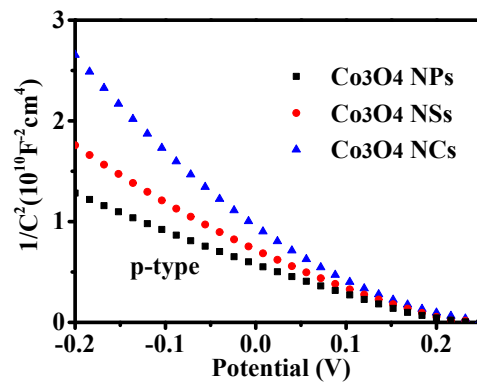

Fig.S3 Mott-Schottky plots of Co<sub>3</sub>O<sub>4</sub> nanostructures

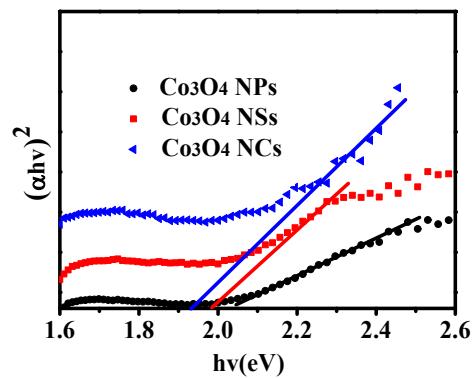

Fig.S4 Band gap of Co<sub>3</sub>O<sub>4</sub> nanostructures

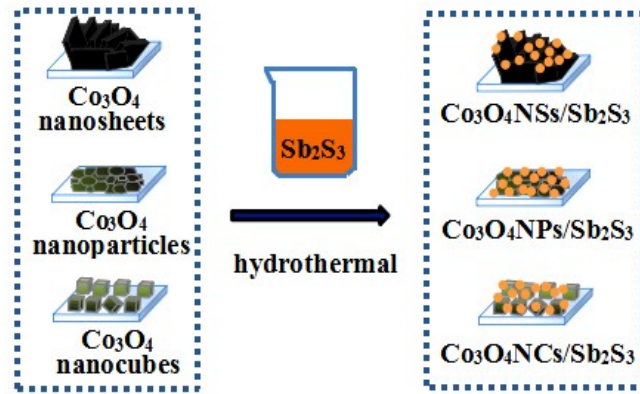

Fig.S5 Brief schematic diagram of synthetic route of  $\text{Co}_3\text{O}_4/\text{Sb}_2\text{S}_3$  heterojunctions

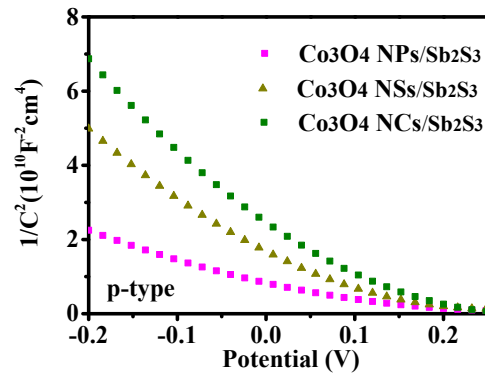

Fig.S6 Mott-Schottky plots of  $\text{Co}_3\text{O}_4/\text{Sb}_2\text{S}_3$  heterojunctions

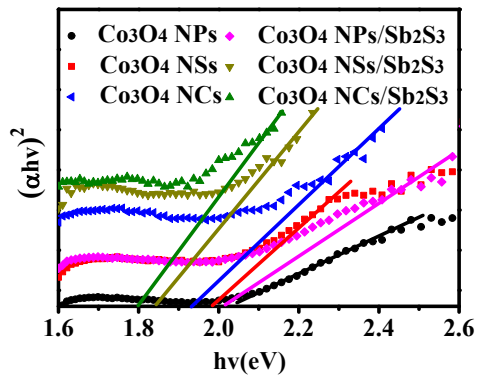

Fig.S7 Band gap of  $\text{Co}_3\text{O}_4/\text{Sb}_2\text{S}_3$  heterojunctions
